# Supplementary material for: Unusual reactivity of 2,2-diphenyl-1-picrylhydrazyl (DPPH) with Fe3+ controlled by competing reactions
Source: Royal Society of Chemistry journal article supplement (doi:10.1039/d3ra07106e), 2024-01-01
Supplement: d3ra07106e1.pdf [file d3ra07106e1.pdf]

## Unusual reactivity of 2,2-diphenyl-1-picrylhydrazyl (DPPH) with $\text{Fe}^{3+}$ controlled by antagonistic reactions

Arlette D. D. Deutchoua,<sup>a,b</sup> Yannick Ngueumaleu,<sup>a</sup> Rossel W. Liendji,<sup>a</sup> Sarrah S. P. Hanga,<sup>a</sup> Bruno B. Nguelo,<sup>a</sup> Gustave K. Dedzo,<sup>a\*</sup> Emmanuel Ngameni<sup>a</sup>

<sup>a</sup> *Laboratory of Analytical Chemistry, Faculty of Sciences, University of Yaoundé I, B. P. 812 Yaoundé, Cameroon.*

<sup>b</sup> *Department of Processing and Quality Control of Aquatic Products, Institute of Fisheries and Aquatic Sciences at Yabassi, University of Douala, B. P. 7236 Douala, Cameroon.*

Corresponding Author

\*E-mail: kennegusto@yahoo.fr.

### Supplementary Information

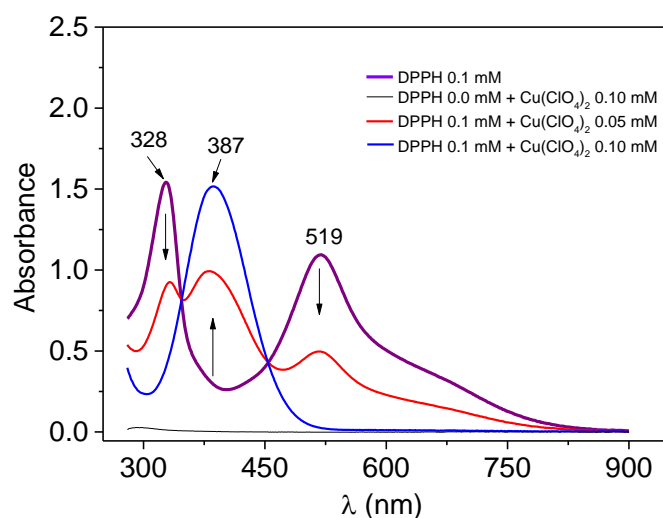

**Figure S1.** UV-Vis spectra of DPPH 0.1 mM in TBAHFP 0.03 M acetonitrile solution, in presence of controlled amounts of copper perchlorate (0.0 mM, 0.05 mM and 0.10 mM).

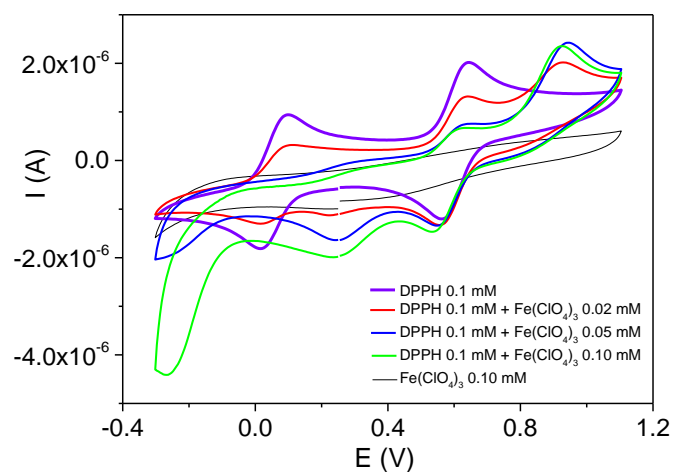

**Figure S2.** Electrochemical signals at equilibrium of DPPH 0.1 mM in TBAHFP 0.03 M acetonitrile solution, in presence of controlled amounts of  $\text{Fe}(\text{ClO}_4)_3$  (0 mM, 0.02 mM, 0.05 mM, and 0.10 mM). The signals were recorded by cyclic voltammetry at stationary glassy carbon electrode at  $50 \text{ mV s}^{-1}$ .
